# Supplementary material
Source: publisher figshare collection journal article supplement (https://gsajournals.figshare.com/ndownloader/files/12533216)
Supplement: Supplementary file 1 [file 12533216]

## Sheet: BiologicalProcess
Table S5. PANTHER ‘Statistical Overrepresentation’ analysis of sets of 133 and 56 genes from the Primary screen.
Analysis of enrichment for Biological Process, Cellular Compartment and Molecular Function (separate tabs) for the sets of 133 and 56 genes.
	Biological Process GO Term	GO ID	Genome Reference List	Input	Expected	Over/ Under	Fold Enrichment	p-value	FDR
133 Genes	rRNA metabolic process	GO:0016072	94	11	0.61	+	17.92	8.34e-11	1.87e-09
	RNA localization	GO:0006403	48	5	0.31	+	15.95	2.38e-05	0.000381
	translation	GO:0006412	149	13	0.97	+	13.36	4.51e-11	1.12e-09
	tRNA aminoacylation for protein translation	GO:0006418	36	3	0.24	+	12.76	0.00206	0.0192
	nuclear transport	GO:0051169	67	5	0.44	+	11.43	0.000105	0.00131
	DNA replication	GO:0006260	79	5	0.52	+	9.69	0.000218	0.00257
	tRNA metabolic process	GO:0006399	84	5	0.55	+	9.11	0.000286	0.0032
	cellular component biogenesis	GO:0044085	423	20	2.76	+	7.24	9.21e-12	2.95e-10
	RNA splicing, via transesterification reactions	GO:0000375	107	5	0.7	+	7.15	0.000821	0.00876
	mRNA splicing, via spliceosome	GO:0000398	119	5	0.78	+	6.43	0.0013	0.0132
	mRNA processing	GO:0006397	209	8	1.37	+	5.86	8.73e-05	0.00122
	RNA metabolic process	GO:0016070	840	27	5.49	+	4.92	8.83e-12	3.3e-10
	DNA metabolic process	GO:0006259	213	6	1.39	+	4.31	0.00309	0.0277
	cellular component organization or biogenesis	GO:0071840	1007	28	6.58	+	4.26	9.19e-11	1.87e-09
	biosynthetic process	GO:0009058	1028	26	6.71	+	3.87	3.39e-09	6.33e-08
	nitrogen compound metabolic process	GO:0006807	1413	34	9.23	+	3.68	2.7e-11	7.56e-10
	protein metabolic process	GO:0019538	1042	25	6.81	+	3.67	1.98e-08	3.42e-07
	nucleobase-containing compound metabolic process	GO:0006139	1510	36	9.86	+	3.65	7.7e-12	3.45e-10
	organelle organization	GO:0006996	608	14	3.97	+	3.53	5.34e-05	0.000797
	cell cycle	GO:0007049	397	9	2.59	+	3.47	0.00135	0.0131
	cellular component organization	GO:0016043	898	17	5.87	+	2.9	9e-05	0.00119
	primary metabolic process	GO:0044238	2940	55	19.2	+	2.86	4.78e-14	5.35e-12
	metabolic process	GO:0008152	3682	61	24.05	+	2.54	1.98e-13	1.48e-11
	cellular process	GO:0009987	4274	69	27.92	+	2.47	4.41e-15	9.87e-13
	Unclassified	UNCLASSIFIED	13969	51	91.24	-	0.56	5.47e-13	3.06e-11
56 Genes	cell proliferation	GO:0008283	20	2	0.06	+	35.82	0.0017	0.0475
	RNA localization	GO:0006403	48	3	0.13	+	22.39	0.000387	0.0289
	rRNA metabolic process	GO:0016072	94	4	0.26	+	15.24	0.00016	0.0359
	mitosis	GO:0007067	120	4	0.34	+	11.94	0.000395	0.0221
	translation	GO:0006412	149	4	0.42	+	9.62	0.00087	0.0325
	primary metabolic process	GO:0044238	2940	18	8.21	+	2.19	0.000901	0.0288
	metabolic process	GO:0008152	3682	22	10.28	+	2.14	0.00036	0.0403
	cellular process	GO:0009987	4274	24	11.93	+	2.01	0.000423	0.019

## Sheet: Cellular Compartment
S5 Table. PANTHER analysis of sets of 133 and 56 genes from the primary screen. (See also other tabs)
	Cellular Compartment GO Term	GO ID	Genome Reference List	Input	Expected	Over/ Under	Fold Enrichment	p-value	FDR
133 Genes	ribosome	GO:0005840	127	15	0.83	+	18.08	2.29e-14	1.96e-13
	nuclear envelope	GO:0005635	38	4	0.25	+	16.12	0.000157	0.000783
	vesicle coat	GO:0030120	22	2	0.14	+	13.92	0.0105	0.0371
	ribonucleoprotein complex	GO:0030529	347	27	2.27	+	11.91	8.74e-21	2.62e-19
	microtubule organizing center	GO:0005815	50	3	0.33	+	9.19	0.00494	0.0197
	cytosol	GO:0005829	363	21	2.37	+	8.86	6.56e-14	4.37e-13
	nucleolus	GO:0005730	94	4	0.61	+	6.52	0.00382	0.0164
	macromolecular complex	GO:0032991	1399	51	9.14	+	5.58	5.49e-25	3.3e-23
	chromosome	GO:0005694	124	4	0.81	+	4.94	0.00973	0.0365
	nucleus	GO:0005634	1124	34	7.34	+	4.63	5.26e-14	3.95e-13
	nucleoplasm	GO:0005654	200	6	1.31	+	4.59	0.00228	0.0105
	protein complex	GO:0043234	1112	29	7.26	+	3.99	1.74e-10	1.04e-09
	organelle	GO:0043226	2293	56	14.98	+	3.74	1.76e-19	3.52e-18
	intracellular	GO:0005622	3191	65	20.84	+	3.12	4.65e-19	6.97e-18
	cytoplasm	GO:0005737	2032	39	13.27	+	2.94	4.86e-10	2.65e-09
	cell part	GO:0044464	3405	65	22.24	+	2.92	1.33e-17	1.6e-16
	Unclassified	UNCLASSIFIED	15905	64	103.88	-	0.62	1.64e-14	1.64e-13
56 Genes	ribosome	GO:0005840	127	6	0.35	+	16.92	1.85e-06	2.77e-05
	microtubule organizing center	GO:0005815	50	2	0.14	+	14.33	0.00923	0.0462
	ribonucleoprotein complex	GO:0030529	347	11	0.97	+	11.35	3.55e-09	1.06e-07
	cytosol	GO:0005829	363	8	1.01	+	7.89	8.15e-06	8.15e-05
	macromolecular complex	GO:0032991	1399	21	3.91	+	5.38	7.09e-11	4.26e-09
	protein complex	GO:0043234	1112	12	3.1	+	3.87	4.96e-05	0.000331
	nucleus	GO:0005634	1124	11	3.14	+	3.51	0.000251	0.00137
	cytoplasm	GO:0005737	2032	17	5.67	+	3	2.59e-05	0.000194
	organelle	GO:0043226	2293	19	6.4	+	2.97	8.24e-06	7.06e-05
	intracellular	GO:0005622	3191	24	8.91	+	2.69	1.61e-06	3.23e-05
	cell part	GO:0044464	3405	24	9.51	+	2.52	5.19e-06	6.23e-05
	Unclassified	UNCLASSIFIED	15905	31	44.41	-	0.7	8.29e-05	0.000497

## Sheet: Molecular Function
S5_Table. PANTHER analysis of sets of 133 and 56 genes from the primary screen. (See also other tabs)
	Molecular Function GO Term	GO ID	Genome Reference List	Input	Expected	Over/ Under	Fold Enrichment	p-value	FDR
133 Genes	structural constituent of ribosome	GO:0003735	103	14	0.67	+	20.81	3.02e-14	5.25e-12
	translation initiation factor activity	GO:0003743	32	3	0.21	+	14.35	0.0015	0.029
	aminoacyl-tRNA ligase activity	GO:0004812	35	3	0.23	+	13.12	0.00191	0.0332
	DNA helicase activity	GO:0003678	36	3	0.24	+	12.76	0.00206	0.0325
	translation regulator activity	GO:0045182	59	4	0.39	+	10.38	0.00075	0.0186
	RNA binding	GO:0003723	270	18	1.76	+	10.21	4.92e-13	4.28e-11
	structural molecule activity	GO:0005198	296	16	1.93	+	8.28	2.02e-10	5.85e-09
	chromatin binding	GO:0003682	86	4	0.56	+	7.12	0.00281	0.0408
	nucleic acid binding	GO:0003676	814	25	5.32	+	4.7	1.49e-10	5.19e-09
	binding	GO:0005488	2049	41	13.38	+	3.06	4.1e-11	1.78e-09
	protein binding	GO:0005515	983	16	6.42	+	2.49	0.000758	0.0165
	Unclassified	UNCLASSIFIED	14562	56	95.11	-	0.59	9.87e-13	5.72e-11
56 Genes	structural constituent of ribosome	GO:0003735	103	6	0.29	+	20.86	5.74e-07	0.0001
	translation regulator activity	GO:0045182	59	3	0.16	+	18.21	0.000688	0.02
	RNA binding	GO:0003723	270	6	0.75	+	7.96	0.000115	0.01
	structural molecule activity	GO:0005198	296	6	0.83	+	7.26	0.000188	0.0082
	binding	GO:0005488	2049	15	5.72	+	2.62	0.000387	0.0135
	Unclassified	UNCLASSIFIED	14562	27	40.66	-	0.66	0.000125	0.00723
